# Supplementary material
Source: HighWire-hosted journal article supplement (https://thorax.bmj.com/content/75/12/1047)

Figure S9

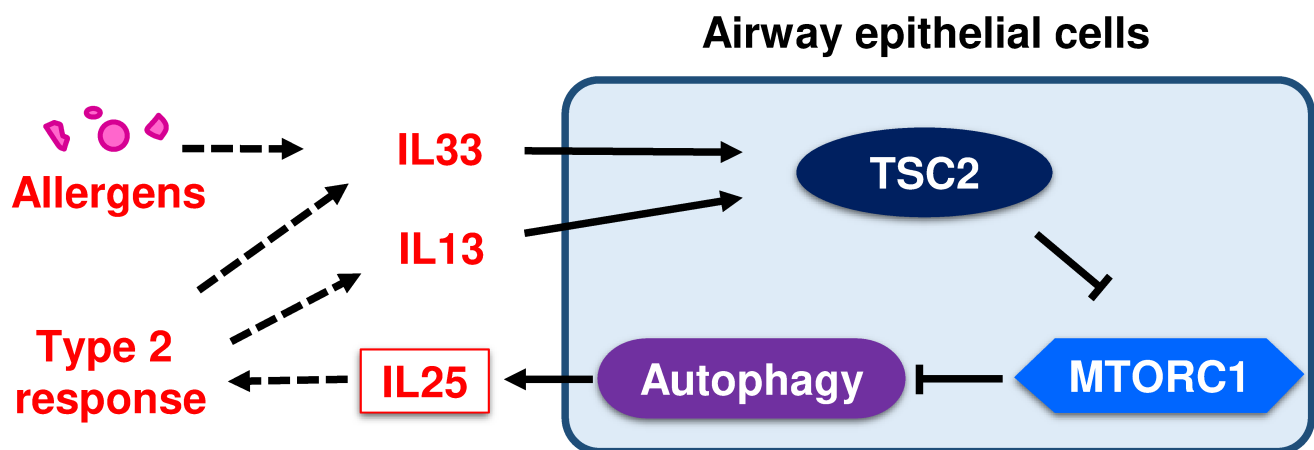

Supplement: inline-supplementary-material-10 [file inline-supplementary-material-10.pdf]

## Figure S1

A

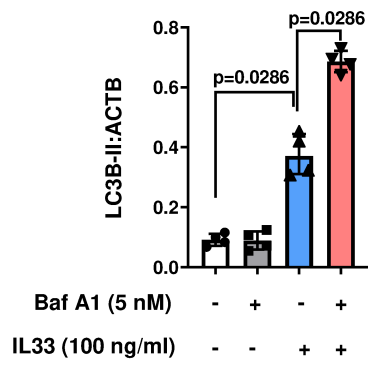

B

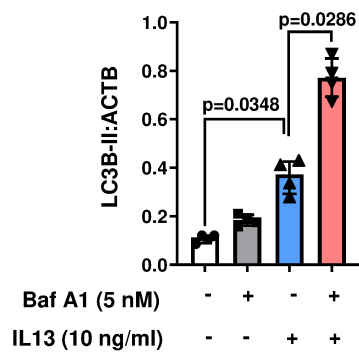

Supplement: inline-supplementary-material-2 [file inline-supplementary-material-2.pdf]

**Figure S2**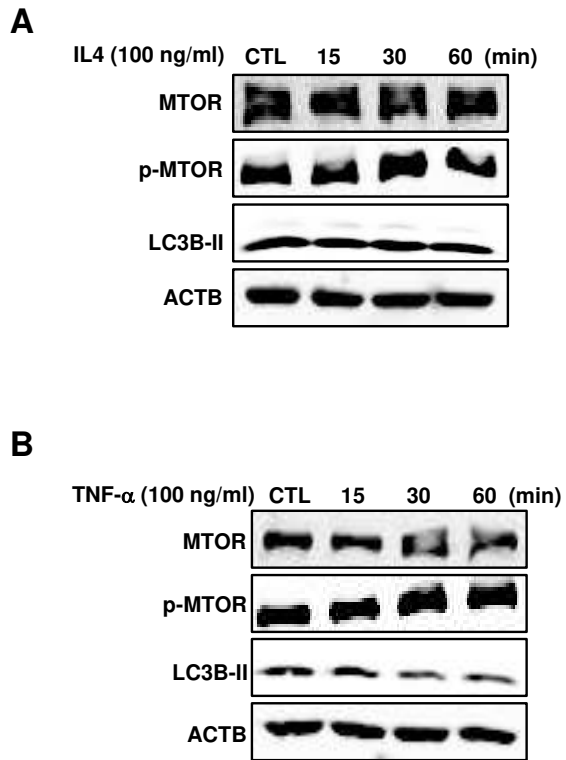

Supplement: inline-supplementary-material-3 [file inline-supplementary-material-3.pdf]

Figure S3

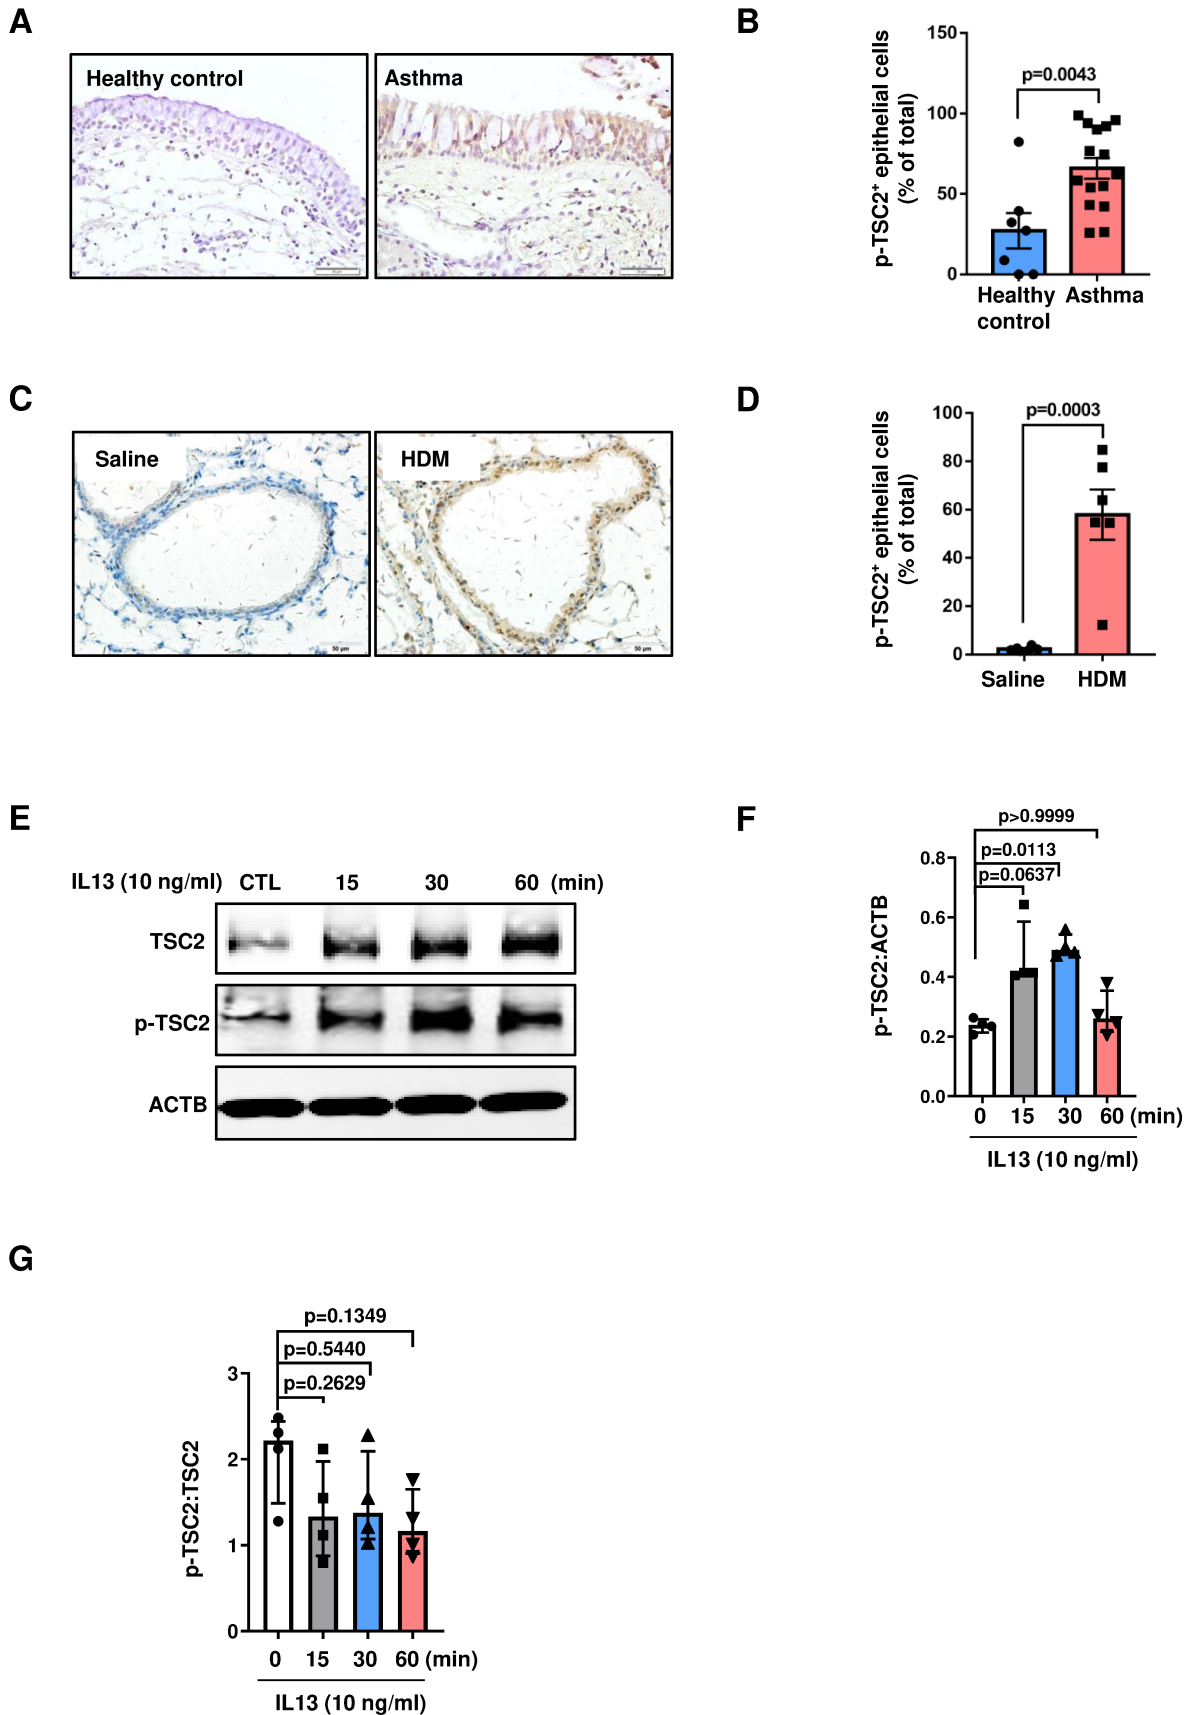

Supplement: inline-supplementary-material-4 [file inline-supplementary-material-4.pdf]

Figure S4

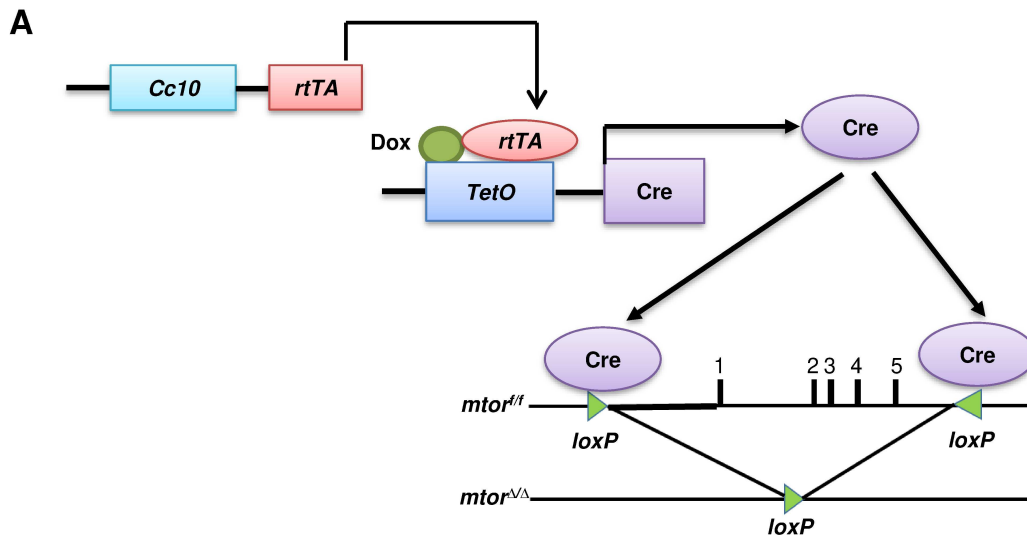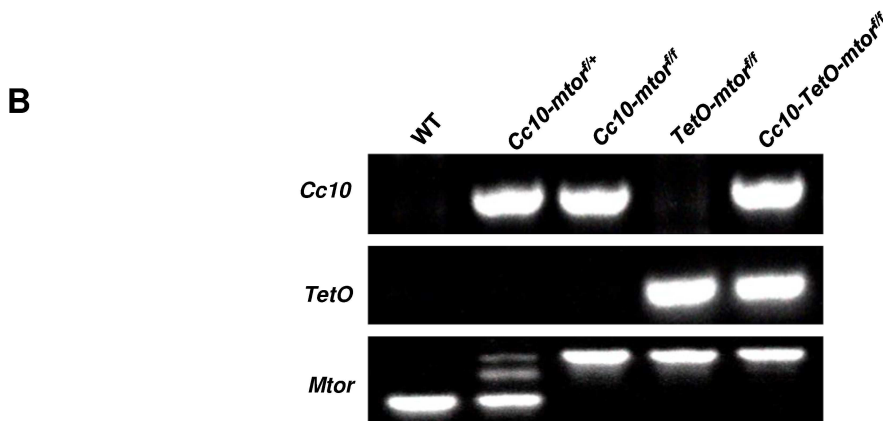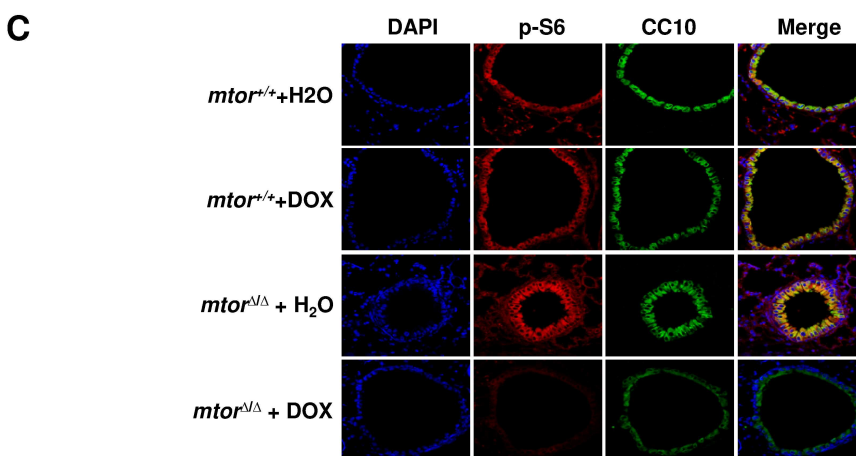

Supplement: inline-supplementary-material-5 [file inline-supplementary-material-5.pdf]

Figure S5

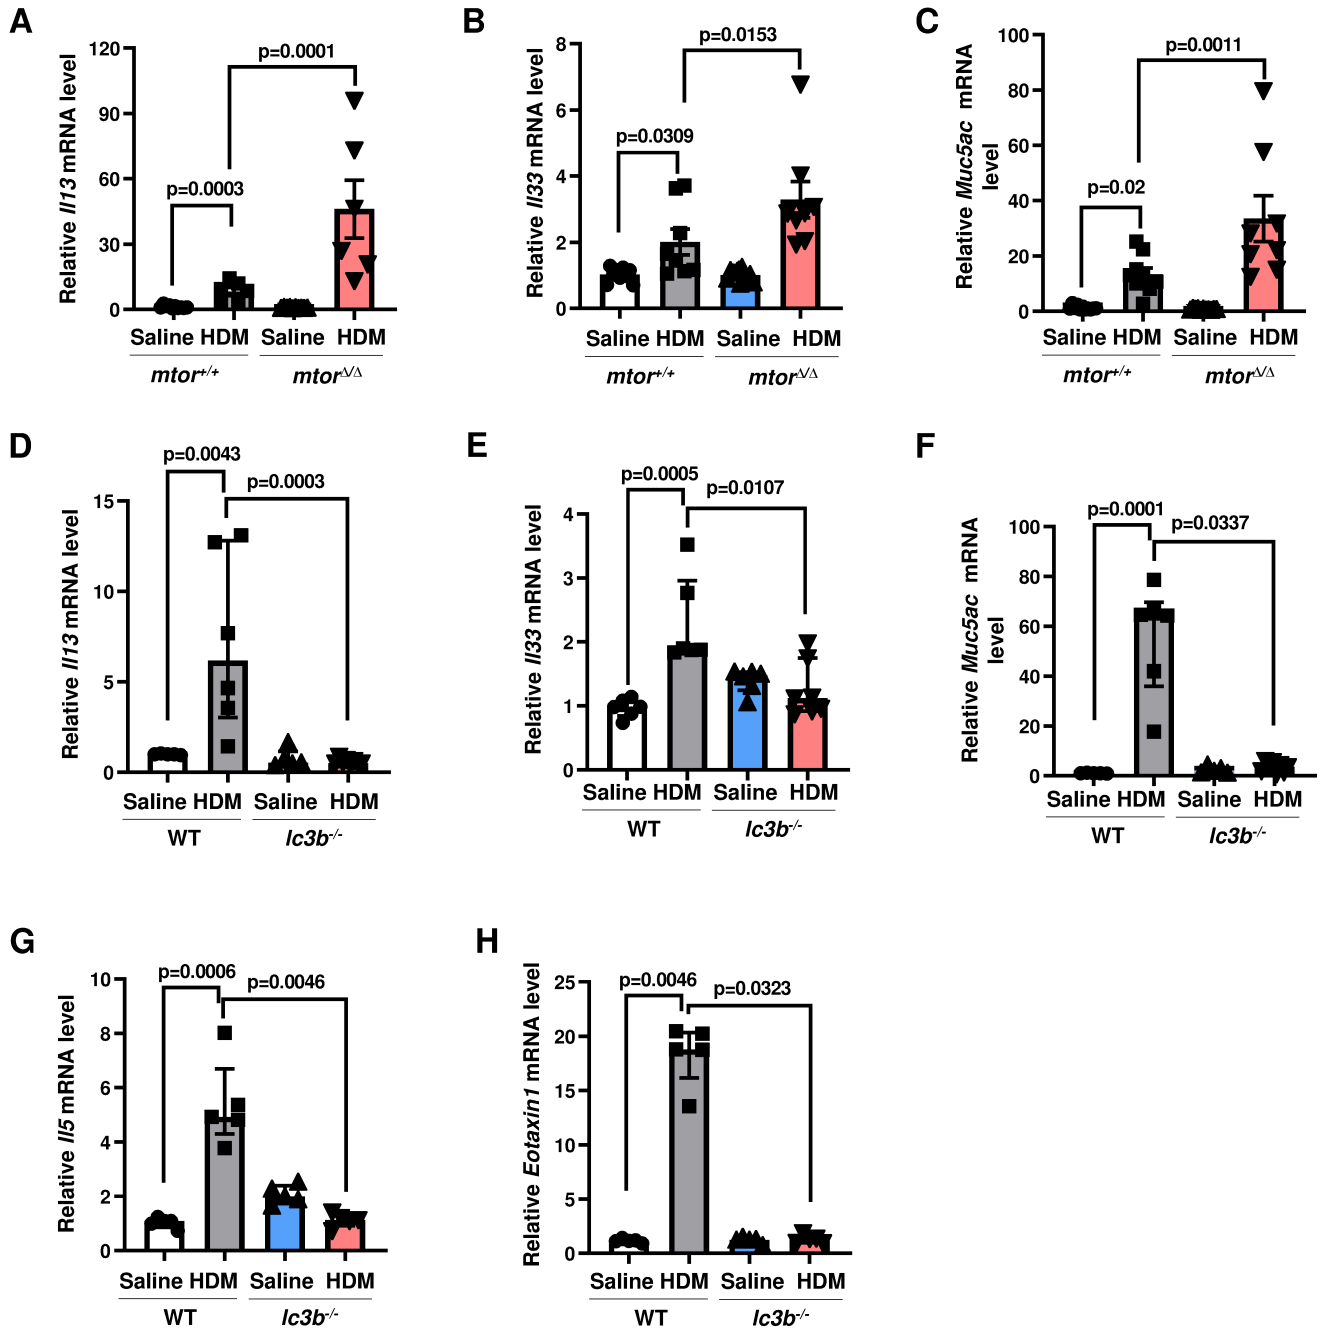

Supplement: inline-supplementary-material-6 [file inline-supplementary-material-6.pdf]

Figure S7

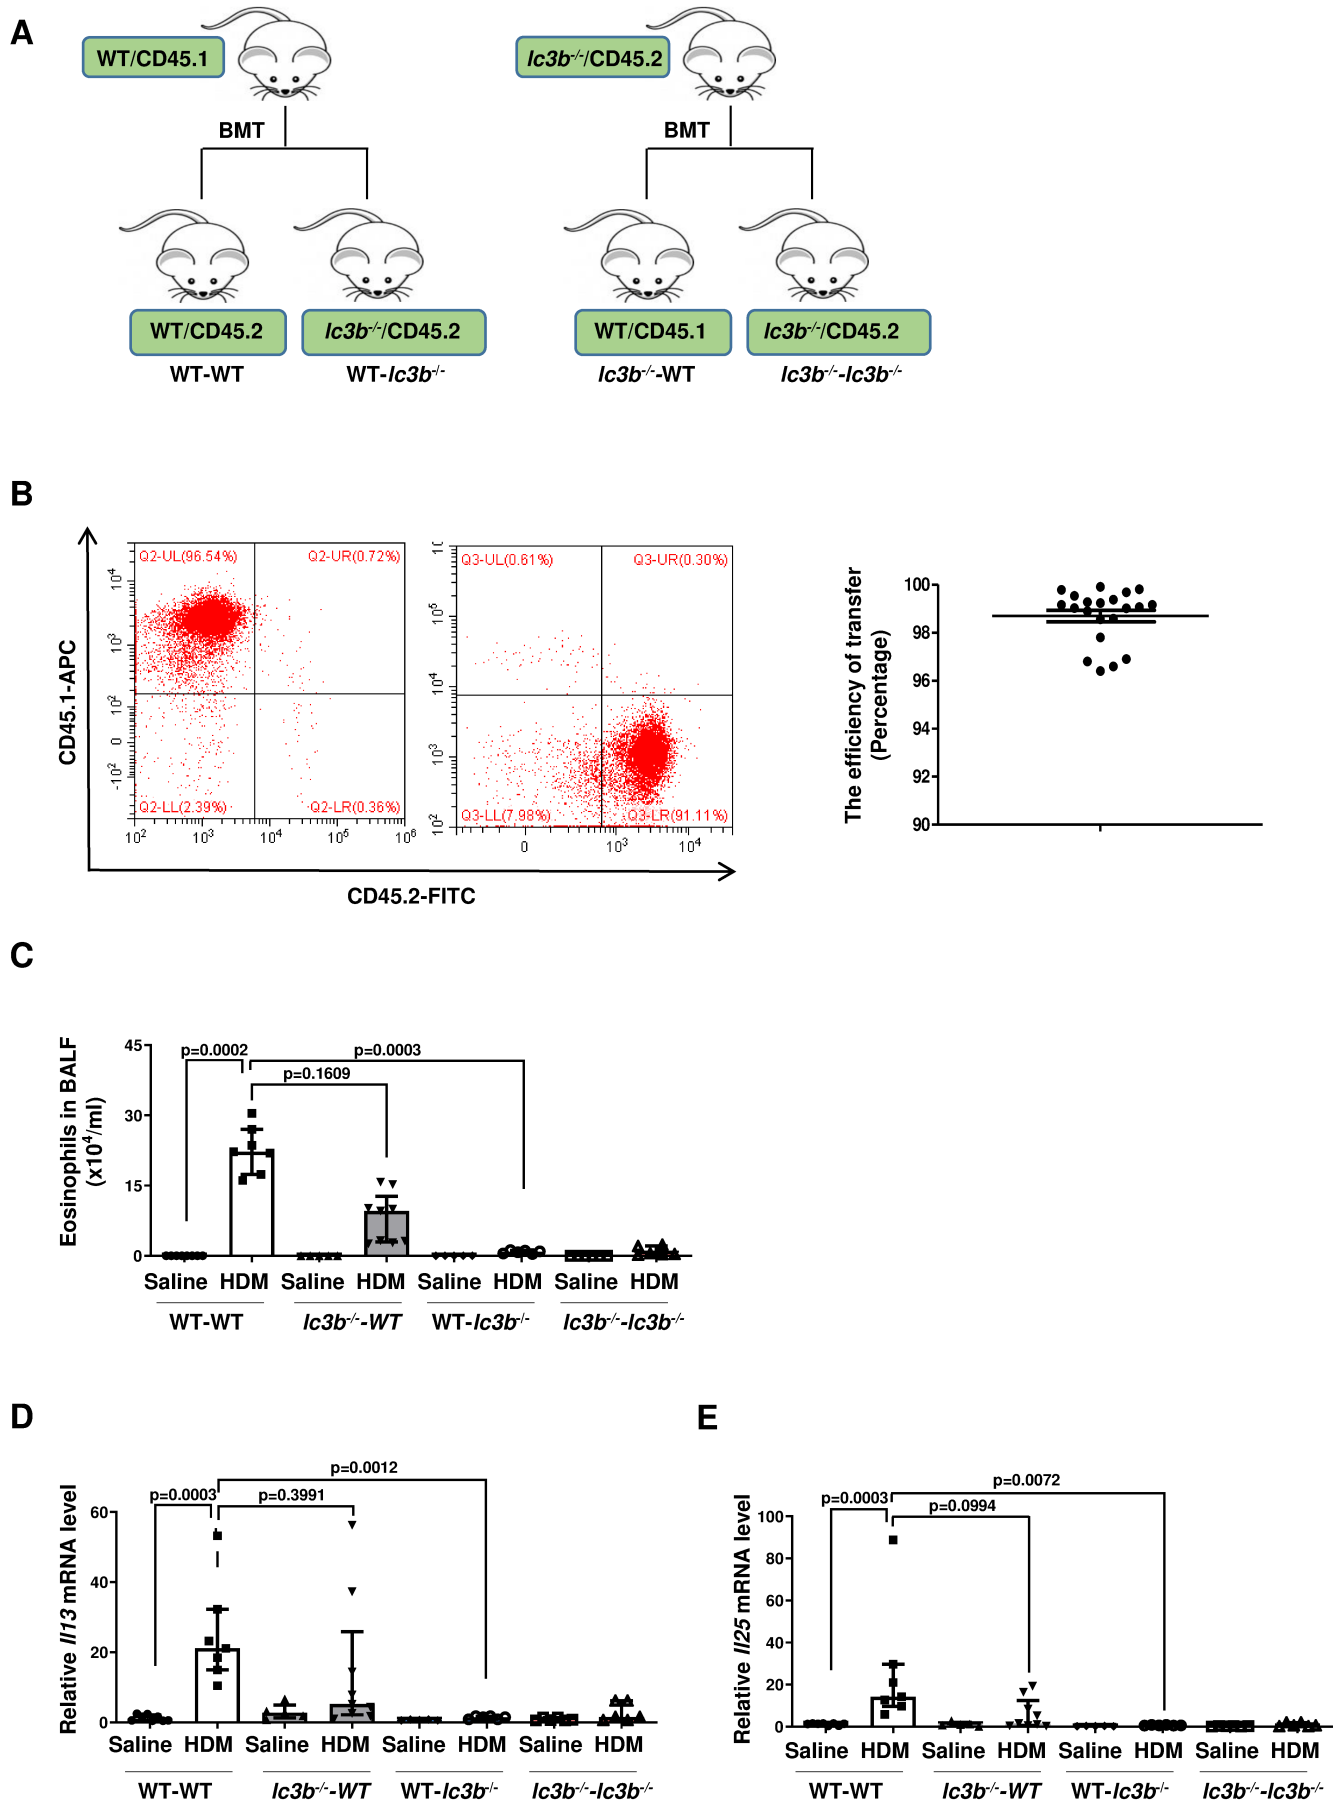

Supplement: inline-supplementary-material-8 [file inline-supplementary-material-8.pdf]

## Figure S8

A

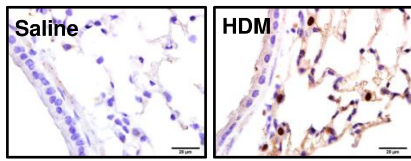

B

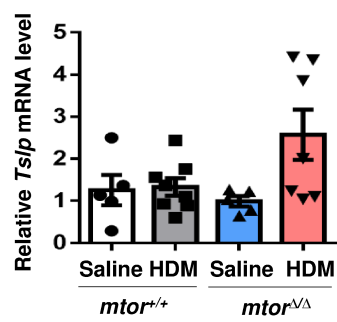

C

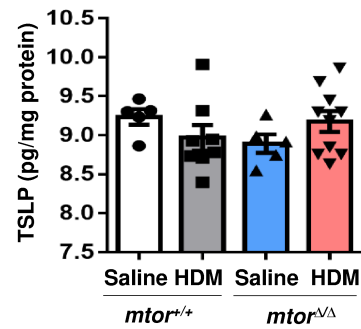

D

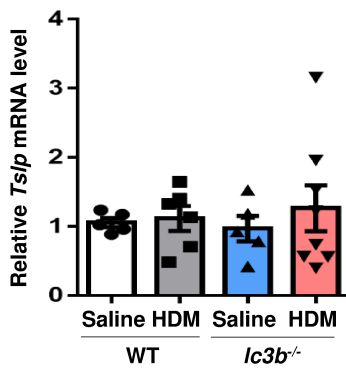

E

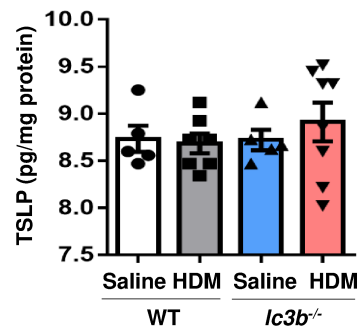

Supplement: inline-supplementary-material-9 [file inline-supplementary-material-9.pdf]
